# Supplementary material
Source: HighWire-hosted journal article supplement (https://bmjopen.bmj.com/content/14/12/e091232)
Supplement: inline-supplementary-material-1 [file inline-supplementary-material-1.pdf]

## Research Instrument

## Hospital WPV Questionnaire-Revised Version

**Explanation :** 1.The data is for research purposes only and confidential to others;  
2.Please tick the appropriate option box, multiple choice questions will be noted;  
3.This survey is voluntary, please fill in according to actual situation, thank you!

The following is an explanation of the concepts covered in this questionnaire to help you better understand:

Patient and visitor violence (PVV): Violence against medical staff by patients and visitors in a hospital setting. In this study, the types of violence include **verbal abuse, threats, physical aggression** (physical aggression including hitting, kicking, patting, pricking, pushing, biting, which may result in injury, mild injury, obvious injury, dysfunction or permanent disability or even death) and **sexual harassment**.

### 1.1 General Information Questionnaire :

1. Gender : Male ☐ Female ☐
2. Age : <30years ☐ 30-39years ☐ 40-49years ☐ > 49 years ☐
3. Working years : \_\_\_\_\_years ( Fill in an integer )
4. Education level : Junior college ☐ College and above ☐
5. Hospital type : General hospital ☐ Specialized hospital ☐
6. Work department : Emergency ☐ Outpatient ☐ Surgery ☐ Internal medicine ☐ Gynecology and Obstetrics ☐ Pediatrics ☐ ICU ☐ Psychiatry ☐ Others : \_\_\_\_\_ ☐
7. Employment form : Staffed employees ☐ Contract employees ☐ Temporary workers ☐

8. Position : Nurse☐     Head nurse and above☐
9. Title : Nurse☐     Nurse practitioner☐     Nurse supervisor☐  
Deputy chief nursing officer and above☐
10. Night shifts per month : No☐     1~4 times☐     5~9 times☐     ≥10 times☐
11. Patients per shift : ≤8 persons☐     9-11persons☐     ≥12persons☐
12. Marital status : Married☐     Unmarried☐     Divorcee☐     Widowed☐
13. Only child : Yes☐     No☐

1.2 Occurrence and reporting of PVV

| <u>In the last 12 months</u> has anyone treated you :                                                                                                                                                                                                                    | Occurrence               |                          | Reporting                |                          |
|--------------------------------------------------------------------------------------------------------------------------------------------------------------------------------------------------------------------------------------------------------------------------|--------------------------|--------------------------|--------------------------|--------------------------|
|                                                                                                                                                                                                                                                                          | Yes                      | No                       | Yes                      | No                       |
| <b>Verbal abuse :</b>                                                                                                                                                                                                                                                    |                          |                          |                          |                          |
| <b>14.</b> Scolding, name-calling, abuse, belittling or other words that undermine personal dignity (in person, by phone, by letter or by leaflet, etc.), but without physical contact.                                                                                  | <input type="checkbox"/> | <input type="checkbox"/> | <input type="checkbox"/> | <input type="checkbox"/> |
| <b>15.</b> Threats : Through speech, spitting, punching, tapping the table, stomping, holding something at you, including telephone, text, third-person communication, etc., but there is no physical contact, the threat content involves personal and property safety. | <input type="checkbox"/> | <input type="checkbox"/> | <input type="checkbox"/> | <input type="checkbox"/> |
| <b>16. Physical aggression :</b> (physical contact or attack with objects), including hitting, kicking, patting, stabbing, pushing, biting, throwing objects, twisting arms, pulling hair, etc.                                                                          | <input type="checkbox"/> | <input type="checkbox"/> | <input type="checkbox"/> | <input type="checkbox"/> |
| <b>17. Sexual Violence :</b> Harassing language or sexual aggression, such as being forcefully pulled, held, kissed, or touched by the opposite sex.                                                                                                                     | <input type="checkbox"/> | <input type="checkbox"/> | <input type="checkbox"/> | <input type="checkbox"/> |

*If you have reported a violent incident in the past year, please continue with question 18;*

*If you have experienced violence and have not reported it in the past year, please continue with question 23.*

### 1.3 Please describe your most memorable reporting experience:

18. The PVV perpetrators in this reported incident is (if there are more than one person, choose the leader only) :

Patient ☐ Patient's family ☐ Visitors (non-family) ☐

19. Gender and age of perpetrators in this reported incident (if there are more than one person, choose the leader only) :

Gender : Male ☐ Female ☐

Age : adolescents ☐ young people ☐ middle-aged ☐ elderly ☐

20. The reporting form of PVV (single choice).

Oral Report ☐ Written Report ☐ Electronic Reporting System ☐

21. The Reporting Objects of PVV (single choice) :

Nursing Department ☐ Head Nurse ☐ Security Guard ☐

Coordination Unit ☐ Police Officer ☐

22. The situation of the perpetrators in this reported incident is (multiple choices can be made) :

1 After Drinking ☐

2 Abnormal mental state ☐

3 Not satisfied with the overall environment of the hospital ☐

4 Not satisfied with the hospital treatment system or process ☐

5 Failed to find a doctor or nurse for many times ☐

6 The waiting time is long ☐

7 His unreasonable request was rejected ☐

8 He refused to accept his current condition ☐

9 Questioning the cost of medical care ☐

10 Dissatisfaction with the nurse's service attitude or communication ☐

11 Failed to perform invasive operations for the first time ☐

12 Others \_\_\_\_\_ ☐

23. If you have not reported PVV, the reasons for not report are (multiple choices

can be made) :

- 1 Reporting was unable to solve the problem☐
- 2 Unclear how to report☐
- 3 Hospitals did not explicitly require reporting☐
- 4 Not clear what should be reported☐
- 5 Lack of attention in hospital attitudes☐
- 6 Too busy to report☐
- 7 Low impact of violence☐
- 8 Lack of reporting atmosphere☐
- 9 Fear of repercussions if reported☐
- 10 Fear of reprisals if reported ☐
- 11 Tedious reporting procedure☐
- 12 The abuser didn't mean it☐
- 13 Fear of ridicule if reported☐
- 14 Others\_\_\_\_\_ ☐

1.4 Your perceptions and attitudes toward reporting violence

| Item                                                       | Yes | No |
|------------------------------------------------------------|-----|----|
| 24. Heard of PVV before                                    |     |    |
| 25. PVV was unavoidable at work                            |     |    |
| 26. PVV not worth the fuss                                 |     |    |
| 27. Nurses need to proactively report PVV                  |     |    |
| 28. Hospitals should make "proactive reporting PVV" a rule |     |    |
| 29. Nurses would benefit from PVV reporting training       |     |    |
| 30. Coworkers' positive reporting affect reporting         |     |    |
| 31. The state or attitude of the abuser affects reporting  |     |    |
| 32. Severity of violence affects reporting                 |     |    |
| 33. Safety of the work environment affects reporting       |     |    |
| 34. Media coverage of violence affects reporting           |     |    |

35. In your opinion, which of the following measures can promote nurses to proactively report PVV (multiple options):

1 Training on PVV reporting can facilitate reporting☐

2 Establishment of a department to deal with PVV could facilitate reporting☐

3 Introduction of a non-punitive reporting system could facilitate reporting☐

4 Strengthening hospital security could facilitate reporting☐

5 Proper media orientation can facilitate reporting☐

6 Others☐

1.5 Hospitals’ attitudes and measures on nurses' PVV reporting

| Item                                                                                                                                                                                                                                                    | Yes | No |
|---------------------------------------------------------------------------------------------------------------------------------------------------------------------------------------------------------------------------------------------------------|-----|----|
| 36. Does your hospital encourage staff to report PVV                                                                                                                                                                                                    |     |    |
| 37. Does your hospital have PVV reporting institution                                                                                                                                                                                                   |     |    |
| 38. Does your hospital have PVV reporting system                                                                                                                                                                                                        |     |    |
| 39. Does your hospital have a specialized department to deal with PVV                                                                                                                                                                                   |     |    |
| 40. Does your hospital offer training on PVV reporting                                                                                                                                                                                                  |     |    |
| 41. What is your hospital's response to PVV reporting :<br>1 Defending the interests of the staff <input type="checkbox"/> 2 Deal fairly <input type="checkbox"/><br>3 Ignore it <input type="checkbox"/> 4 Chastise employees <input type="checkbox"/> |     |    |
| 42. Your hospital pays more attention to doctors’ PVV reporting or nurses’ ?<br>1 Emphasis doctors more <input type="checkbox"/> 2 Emphasis nurses more <input type="checkbox"/> 3 Pay attention equally <input type="checkbox"/>                       |     |    |

1.6 Chinese Nurse Stressor Scale

The following table is used to assess the individual's work stress, please tick "√" where it suits your actual situation.

| Item                                        | 1                 | 2        | 3     | 4              |
|---------------------------------------------|-------------------|----------|-------|----------------|
|                                             | Strongly Disagree | Disagree | Agree | Strongly Agree |
| 1. The social status of nursing work is low |                   |          |       |                |

| Item                                                                                  | 1                 | 2        | 3     | 4              |
|---------------------------------------------------------------------------------------|-------------------|----------|-------|----------------|
|                                                                                       | Strongly Disagree | Disagree | Agree | Strongly Agree |
| 2. There are too few opportunities for further study                                  |                   |          |       |                |
| 3. Low salary and other benefits                                                      |                   |          |       |                |
| 4. There are too few opportunities for advancement                                    |                   |          |       |                |
| 5. Work shifts regularly                                                              |                   |          |       |                |
| 6. Less independence at work                                                          |                   |          |       |                |
| 7. The division of work is not clear                                                  |                   |          |       |                |
| 8. Too much work                                                                      |                   |          |       |                |
| 9. The number of nurses on duty is low                                                |                   |          |       |                |
| 10. There is no time for psychological care                                           |                   |          |       |                |
| 11. Too much non-defensive work                                                       |                   |          |       |                |
| 12. Too Much useless paper work                                                       |                   |          |       |                |
| 13. Poor working environment                                                          |                   |          |       |                |
| 14. Equipment required is insufficient                                                |                   |          |       |                |
| 15. Crowded ward                                                                      |                   |          |       |                |
| 16. Worry about mistakes and accidents at work                                        |                   |          |       |                |
| 17. Nurses' work is not recognized by patients and their families                     |                   |          |       |                |
| 18. The patient in care is too sick                                                   |                   |          |       |                |
| 19. The patient's family is not polite                                                |                   |          |       |                |
| 20. The patient's requirements are too high or too excessive                          |                   |          |       |                |
| 21. The patient is impolite                                                           |                   |          |       |                |
| 21. The patient is uncooperative                                                      |                   |          |       |                |
| 22. The knowledge can not meet the psychological needs of patients and their families |                   |          |       |                |
| 23. Lack of knowledge about patient education                                         |                   |          |       |                |
| 25. Worry that the nursing operation will cause the patient pain                      |                   |          |       |                |
| 26. The patient in care dies suddenly                                                 |                   |          |       |                |
| 27. Lack of understanding and respect from                                            |                   |          |       |                |

| Item                                                               | 1                 | 2        | 3     | 4              |
|--------------------------------------------------------------------|-------------------|----------|-------|----------------|
|                                                                    | Strongly Disagree | Disagree | Agree | Strongly Agree |
| other health workers                                               |                   |          |       |                |
| 28. Insufficient understanding and support from nursing managers   |                   |          |       |                |
| 29. Too much criticism from nursing managers                       |                   |          |       |                |
| 30. Doctors are too picky about their care                         |                   |          |       |                |
| 31. Lack of understanding and support between colleagues           |                   |          |       |                |
| 32. Conflict with nursing administrators                           |                   |          |       |                |
| 33. It is difficult to work with some of the nurses in the ward    |                   |          |       |                |
| 34. Conflict with doctors                                          |                   |          |       |                |
| 35. Lack of friendly and cooperative atmosphere between colleagues |                   |          |       |                |

1.7 Chinese Big Five Personality Inventory Brief Version

Here are some sentences that describe people's personality traits. Please tick "√" where it suits you.

| Item                                                   | 1          | 2          | 3            | 4            | 5          | 6         |
|--------------------------------------------------------|------------|------------|--------------|--------------|------------|-----------|
|                                                        | Not at all | Mostly not | Somewhat not | Somewhat yes | Mostly yes | Fully yes |
| 1. I often feel scared                                 |            |            |              |              |            |           |
| 2. Once I set a goal, I will stick to it               |            |            |              |              |            |           |
| 3. I think most people are basically well-intentioned  |            |            |              |              |            |           |
| 4. My mind is often filled with vivid pictures         |            |            |              |              |            |           |
| 5 . I get bored at large parties                       |            |            |              |              |            |           |
| 6. Sometimes I feel worthless                          |            |            |              |              |            |           |
| 7. I often make a decision after careful consideration |            |            |              |              |            |           |
| 8. I don't care much if others are treated unfairly    |            |            |              |              |            |           |
| 9. I'm a risk-taker and unconventional person          |            |            |              |              |            |           |

| Item                                                                                      | 1          | 2          | 3            | 4            | 5          | 6         |
|-------------------------------------------------------------------------------------------|------------|------------|--------------|--------------|------------|-----------|
|                                                                                           | Not at all | Mostly not | Somewhat not | Somewhat yes | Mostly yes | Fully yes |
| 10. At lively parties, I often take the initiative and play to my heart's content         |            |            |              |              |            |           |
| 11. A careless word from others, I often relate to myself                                 |            |            |              |              |            |           |
| 12. Others think I am a cautious person                                                   |            |            |              |              |            |           |
| 13. I often feel that the pain of others has nothing to do with me                        |            |            |              |              |            |           |
| 14. I like adventure                                                                      |            |            |              |              |            |           |
| 15. I try to avoid large parties and noisy environments                                   |            |            |              |              |            |           |
| 16. In the face of pressure, I have a feeling that I am going to collapse                 |            |            |              |              |            |           |
| 17. I like to plan things out at the beginning                                            |            |            |              |              |            |           |
| 18. I am the kind of person who only takes care of himself and doesn't worry about others |            |            |              |              |            |           |
| 19. I have a strong curiosity about many things                                           |            |            |              |              |            |           |
| 20. I am in the occasion generally will not be cold                                       |            |            |              |              |            |           |
| 21. I often worry about things that do not matter                                         |            |            |              |              |            |           |
| 22. I work or study very hard                                                             |            |            |              |              |            |           |
| 23. Although there are some liars in society, I think most people are still credible      |            |            |              |              |            |           |
| 24. I have a spirit of adventure that others do not have                                  |            |            |              |              |            |           |
| 25. In a team, I want to be in a leadership position                                      |            |            |              |              |            |           |
| 26. I often feel that the heart is not steadfast                                          |            |            |              |              |            |           |
| 27. I am a person to do everything                                                        |            |            |              |              |            |           |



| Item                                                                                                                                         | 1          | 2          | 3            | 4            | 5          | 6         |
|----------------------------------------------------------------------------------------------------------------------------------------------|------------|------------|--------------|--------------|------------|-----------|
|                                                                                                                                              | Not at all | Mostly not | Somewhat not | Somewhat yes | Mostly yes | Fully yes |
| 28. When others tell me their misfortune, I often feel sad                                                                                   |            |            |              |              |            |           |
| 29. I am eager to learn something new, even if it has nothing to do with my daily life                                                       |            |            |              |              |            |           |
| 30. others think I am a warm and friendly person                                                                                             |            |            |              |              |            |           |
| 31. I often worry that something bad is going to happen                                                                                      |            |            |              |              |            |           |
| 32. At work, I usually just want to get by                                                                                                   |            |            |              |              |            |           |
| 33. In spite of the dark things that exist in human society (such as war, crime, fraud), I still believe that human nature is generally good |            |            |              |              |            |           |
| 34. I have a very rich imagination                                                                                                           |            |            |              |              |            |           |
| 35.I enjoy attending social and entertainment parties                                                                                        |            |            |              |              |            |           |
| 36. I rarely feel blue and depressed                                                                                                         |            |            |              |              |            |           |
| 36. Pay attention to logic and organization is one of my characteristics                                                                     |            |            |              |              |            |           |
| 38. I often feel sorry for those who suffer misfortune                                                                                       |            |            |              |              |            |           |
| 39. I am willing and easy to accept those new things, new ideas, new ideas                                                                   |            |            |              |              |            |           |
| 40. I want to lead, not be led                                                                                                               |            |            |              |              |            |           |
