# Supplementary material
Source: HighWire-hosted journal article supplement (https://bmjopen.bmj.com/content/14/12/e091232)
Supplement: inline-supplementary-material-2 [file inline-supplementary-material-2.pdf]

1                   **Table S1** General information of the study subjects [n=1,813, n(%)]

| Item            | Category                              | Nurses, n( % ) |
|-----------------|---------------------------------------|----------------|
| Gender          | Male                                  | 111 (6.1)      |
|                 | Female                                | 1702 (93.9)    |
| Age             | <30years                              | 627 (34.6)     |
|                 | 30~39years                            | 838 (46.2)     |
|                 | 40~49years                            | 286 (15.8)     |
|                 | ≥50 years                             | 62 (3.4)       |
| Working years   | <6years                               | 399 (22.0)     |
|                 | 7~10years                             | 600 (33.1)     |
|                 | 11~15years                            | 369 (20.4)     |
|                 | ≥16 years                             | 445 (24.5)     |
| Education level | Junior college                        | 226 (12.5)     |
|                 | College and above                     | 1587 (87.5)    |
| Hospital type   | General hospital                      | 1491 (82.2)    |
|                 | Specialized hospital                  | 322 (17.8)     |
| Work department | Emergency                             | 363 (20.0)     |
|                 | Outpatient                            | 104 (5.7)      |
|                 | Surgery                               | 349 (19.2)     |
|                 | Internal medicine                     | 458 (25.3)     |
|                 | Gynecology           and   Obstetrics | 67 (3.7)       |

| Item                   | Category                               | Nurses, n(%) |
|------------------------|----------------------------------------|--------------|
|                        | Pediatrics                             | 76 (4.2)     |
|                        | ICU                                    | 59 (3.3)     |
|                        | Psychiatry                             | 275 (15.2)   |
|                        | Others                                 | 62 (3.4)     |
| Employment form        | Staffed employees                      | 777 (42.8)   |
|                        | Contract employees                     | 1022 (56.4)  |
|                        | Temporary workers                      | 14 (0.8)     |
| Position               | Nurse                                  | 1662 (91.7)  |
|                        | Head nurse and above                   | 151 (8.3)    |
| Title                  | Nurse                                  | 196 (10.8)   |
|                        | Nurse practitioner                     | 616 (34.0)   |
|                        | Nurse supervisor                       | 811 (44.7)   |
|                        | Deputy chief nursing officer and above | 190 (10.5)   |
|                        |                                        |              |
| Night shifts per month | No                                     | 226 (12.4)   |
|                        | 1~4 times                              | 908 (50.1)   |
|                        | 5~9 times                              | 505 (27.9)   |
|                        | ≥10 times                              | 174 (9.6)    |
|                        |                                        |              |
| Patients per shift     | ≤ 8 persons                            | 414 (22.8)   |
|                        | 9~11 persons                           | 485 (26.8)   |
|                        | ≥12 persons                            | 914 (50.4)   |

| Item           | Category  | Nurses, n(%) |
|----------------|-----------|--------------|
| Marital status | Married   | 1306 (72.0)  |
|                | Unmarried | 470 (25.9)   |
|                | Divorcee  | 36 (2.0)     |
|                | Widowed   | 1 (0.1)      |
| Only child     | Yes       | 792 (43.7)   |
|                | No        | 1021 (56.3)  |

2

3

4

5

6

7

8

9

10

11

12

13

14

15

16

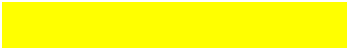

17

18

19

20

21

22

23

24

25

26

27

28

29

Table S2 PVV reporting process [n=292, n(%)]

| Item              | Category                    | Nurses, n( % ) |
|-------------------|-----------------------------|----------------|
| Reporting Methods | Oral Report                 | 256 (87.7)     |
|                   | Electronic Reporting System | 20 (6.8)       |
|                   | Written Report              | 16 (5.5)       |
| Reporting Objects | Head Nurse                  | 235 (80.5)     |
|                   | Nursing Department          | 21 (7.2)       |
|                   | Security Guard              | 17 (5.8)       |
|                   | Coordination Unit           | 17 (5.8)       |
|                   | Police Officer              | 2 (0.7)        |

30

31

32

33

34

35

36

**Table S3** Reasons for nurses not reporting PVV [n=1,521, n(%)]

| Item                                           | Nurses, n( %) |
|------------------------------------------------|---------------|
| Reporting was unable to solve the problem      | 800 (52.6)    |
| Unclear how to report                          | 730 (48.0)    |
| Hospitals did not explicitly require reporting | 728 (47.9)    |
| Not clear what should be reported              | 720 (47.3)    |
| Lack of attention in hospital attitudes        | 514 (33.8)    |
| Too busy to report                             | 486 (32.0)    |
| Low impact of violence                         | 471 (31.0)    |
| Lack of reporting atmosphere                   | 445 (29.3)    |
| Fear of repercussions if reported              | 397 (26.1)    |
| Fear of reprisals if reported                  | 290 (19.1)    |
| Tedious reporting procedure                    | 198 (13.0)    |
| The abuser didn't mean it                      | 184 (12.1)    |
| Fear of ridicule if reported                   | 173 (11.4)    |
| Others                                         | 98 (6.4)      |

**Table S4** Reporting rates of PVV among nurses with different personality traits

[n=1,813, n(%)]

| Item              | Nurses,<br>n(%) | Whether or not to report a PVV exposure |             | x <sup>2</sup> | P      |
|-------------------|-----------------|-----------------------------------------|-------------|----------------|--------|
|                   |                 | Yes (n=292)                             | No (n=1521) |                |        |
|                   |                 |                                         |             |                |        |
| Neuroticism       | 218 (12.0)      | 16 (7.3)                                | 202 (92.7)  | 26.158         | <0.001 |
| Conscientiousness | 690 (38.1)      | 117 (17.0)                              | 573 (83.0)  |                |        |
| Agreeableness     | 490 (27.0)      | 105 (21.4)                              | 385 (78.6)  |                |        |
| Openness          | 369 (20.4)      | 49 (13.3)                               | 320 (86.7)  |                |        |
| Extraversion      | 46 (2.5)        | 5 (10.9)                                | 41 (89.1)   |                |        |

**Table S5** Reporting rates of PVV among nurses with different levels of work stress

[n=1,813, n(%)]

| Item                 | Category   | Nurses,<br>n( %) | Whether or not to report a<br>PVV exposure |             | Z      | P      |
|----------------------|------------|------------------|--------------------------------------------|-------------|--------|--------|
|                      |            |                  | Yes (n=292)                                | No (n=1521) |        |        |
|                      |            |                  |                                            |             |        |        |
| Level of work stress | Mildly     | 62 (3.4)         | 14 (22.6)                                  | 48 (77.4)   | -6.275 | <0.001 |
|                      | Moderately | 1144 (63.1)      | 227 (19.8)                                 | 917 (80.2)  |        |        |
|                      | Severe     | 607 (33.5)       | 51 (8.4)                                   | 556 (91.6)  |        |        |

**Table S6** Independent variable assignment methods

| <b>independent variable</b>                                                | <b>assignment method</b>                                                                                                                                                       |
|----------------------------------------------------------------------------|--------------------------------------------------------------------------------------------------------------------------------------------------------------------------------|
| Gender                                                                     | Male = 1, Female = 0                                                                                                                                                           |
| Hospital type                                                              | General hospital=1, Specialized hospitals = 2                                                                                                                                  |
| Work department                                                            | With "Internal Medicine" for reference, set up "Emergency", "Outpatient", "Surgery", "Gynecology and Obstetrics", "Pediatrics", "ICU", "Psychiatry" "Others" 8 dummy variables |
| Night shifts per month                                                     | No = 1, 1~4 times = 2, 5~9 times = 3, $\geq 10$ times = 4                                                                                                                      |
| Personality trait                                                          | With "Neuroticism" for reference, set up "Rigor", "Agreeableness", "Openness", "Extraversion" 4 dummy variables                                                                |
| Levels of work stress                                                      | Mildly= 1, Moderate = 2, Severe = 3                                                                                                                                            |
| Heard of PVV before                                                        | Yes = 1, No = 0                                                                                                                                                                |
| PVV not worth the fuss                                                     | Yes = 1, No = 0                                                                                                                                                                |
| The state or attitude of the abuser affects reporting                      | Yes = 1, No = 0                                                                                                                                                                |
| Severity of violence affects reporting                                     | Yes = 1, No = 0                                                                                                                                                                |
| Safety of the work environment affects reporting                           | Yes = 1, No = 0                                                                                                                                                                |
| Media coverage of violence affects reporting                               | Yes = 1, No = 0                                                                                                                                                                |
| Training on PVV reporting can facilitate reporting                         | Yes = 1, No = 0                                                                                                                                                                |
| Establishment of a department to deal with PVV could facilitate reporting  | Yes = 1, No = 0                                                                                                                                                                |
| Introduction of a non-punitive reporting system could facilitate reporting | Yes = 1, No = 0                                                                                                                                                                |
| Strengthening hospital security could facilitate reporting                 | Yes = 1, No = 0                                                                                                                                                                |
| Proper media orientation can facilitate reporting                          | Yes = 1, No = 0                                                                                                                                                                |
| Encourage reporting                                                        | Yes = 1, No = 0                                                                                                                                                                |
| Reporting institution                                                      | Yes = 1, No = 0                                                                                                                                                                |
| Reporting system                                                           | Yes = 1, No = 0                                                                                                                                                                |
| Specialized department                                                     | Yes = 1, No = 0                                                                                                                                                                |
| Reporting training                                                         | Yes = 1, No = 0                                                                                                                                                                |
| Hospital attitude                                                          | With "Chastise employees" for reference, set up "Defending the interests of the staff", "Deal fairly ", "Ignore it" 3 dummy variables                                          |
| Degree of attention                                                        | With "Emphasis doctors more" for reference, set up                                                                                                                             |



| independent variable | assignment method                                                    |
|----------------------|----------------------------------------------------------------------|
|                      | "Emphasis nurses more" and "Pay attention equally" 2 dummy variables |

73

74

75

76

77

78

79

80

81

82

83

84

85

86

87

88

89

90

91
